# Supplementary material for: Oxidative Stress Resistance 1 Gene Therapy Retards Neurodegeneration in the rd1 Mutant Mouse Model of Retinopathy
Source: PubMed Central journal article supplement — Invest Ophthalmol Vis Sci. 2021 Sep 10;62(12):8. doi: 10.1167/iovs.62.12.8 (PMC8434758; doi:10.1167/iovs.62.12.8), 2021-09-10
Supplement: iovs-62-12-8_s001.pdf [file iovs-62-12-8_s001.pdf]

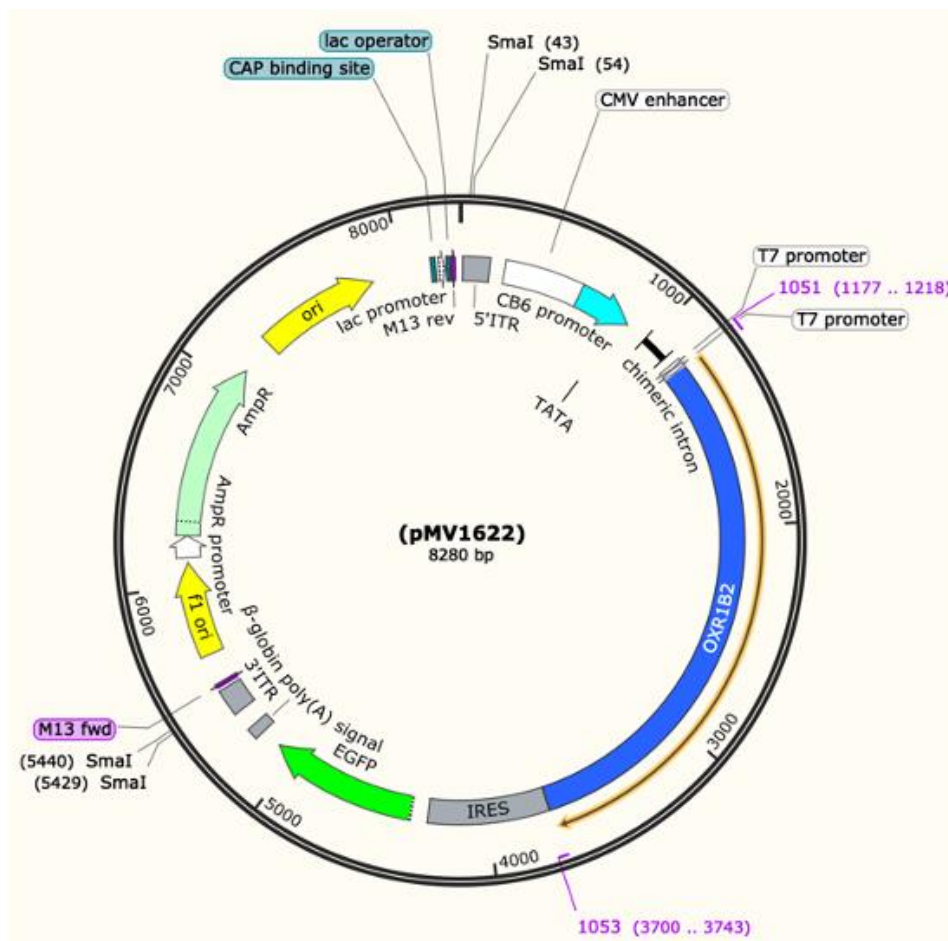

Figure S1 **AAV vector cassette for virus production.** The AAV2 DNA cassette was used to clone the hOXR1 gene. The resultant cassette carries in clockwise manner an ITR sequence, CB6 promoter, CMV enhancer, hOXR1 (hOXR1B2) coding sequence, chimeric intron (a short hybrid intron comprised of parts of the beta-actin and the immunoglobulin heavy chain gene), IRES element, EGFP coding sequence, polyadenylation signal sequence and second ITR sequence.
