# Supplementary material for: Oxidative Stress Resistance 1 Gene Therapy Retards Neurodegeneration in the rd1 Mutant Mouse Model of Retinopathy
Source: PubMed Central journal article supplement — Invest Ophthalmol Vis Sci. 2021 Sep 10;62(12):8. doi: 10.1167/iovs.62.12.8 (PMC8434758; doi:10.1167/iovs.62.12.8), 2021-09-10
Supplement: iovs-62-12-8_s002.pdf [file iovs-62-12-8_s002.pdf]

## P1 injection

Figure S2A

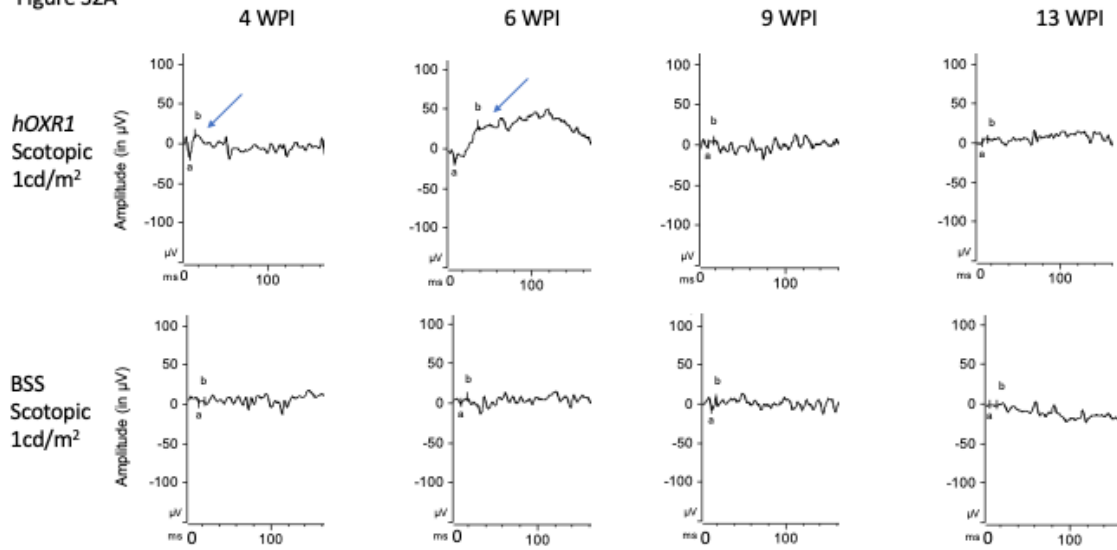

Figure S2B

## P1 injection

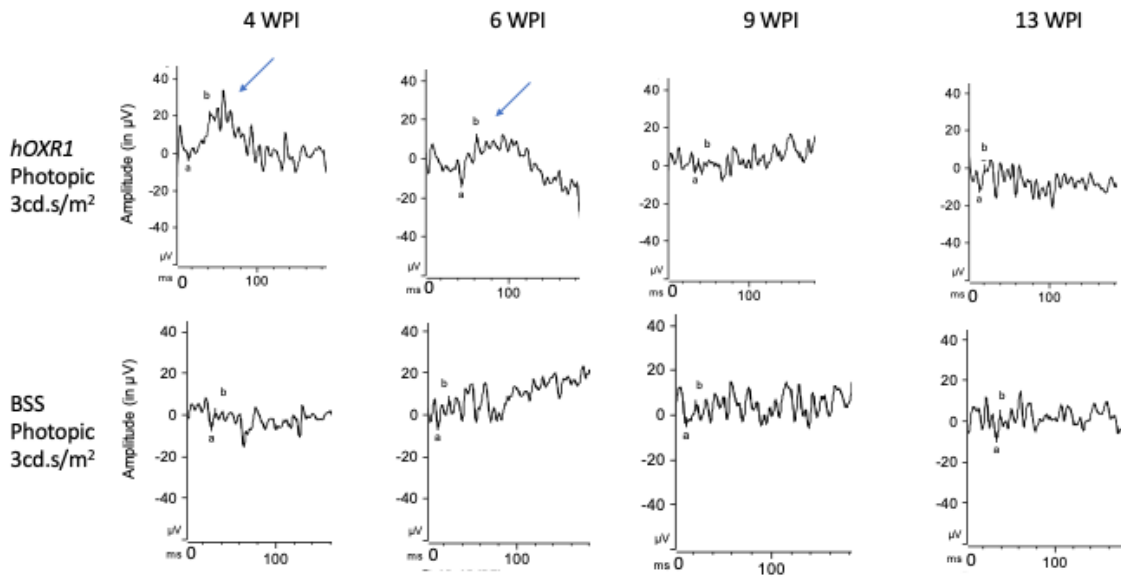

Figure S2 ERG traces of *rd1* mice AAV8-*hOXR1* treated or mock treated at P1. (A) Scotopic ERG

traces of the *rd1* mice subretinally injected with AAV8-*hOXR1* (upper panel) or mock injected

controls (Lower panel) at P1 were presented at the indicated weeks post-injection (WPI). (B) Photopic ERG traces of the *rd1* mice subretinally injected with AAV8-*hOXR1* (upper panel) or mock injected controls (Lower panel) at P1 were presented at the indicated weeks post-injection (WPI). Arrows denote improvement in the ERG responses in the AAV8-*hOXR1* injected retinas at the indicated WPI.
