# Supplementary material for: Oxidative Stress Resistance 1 Gene Therapy Retards Neurodegeneration in the rd1 Mutant Mouse Model of Retinopathy
Source: PubMed Central journal article supplement — Invest Ophthalmol Vis Sci. 2021 Sep 10;62(12):8. doi: 10.1167/iovs.62.12.8 (PMC8434758; doi:10.1167/iovs.62.12.8), 2021-09-10
Supplement: iovs-62-12-8_s003.pdf [file iovs-62-12-8_s003.pdf]

Figure S3A

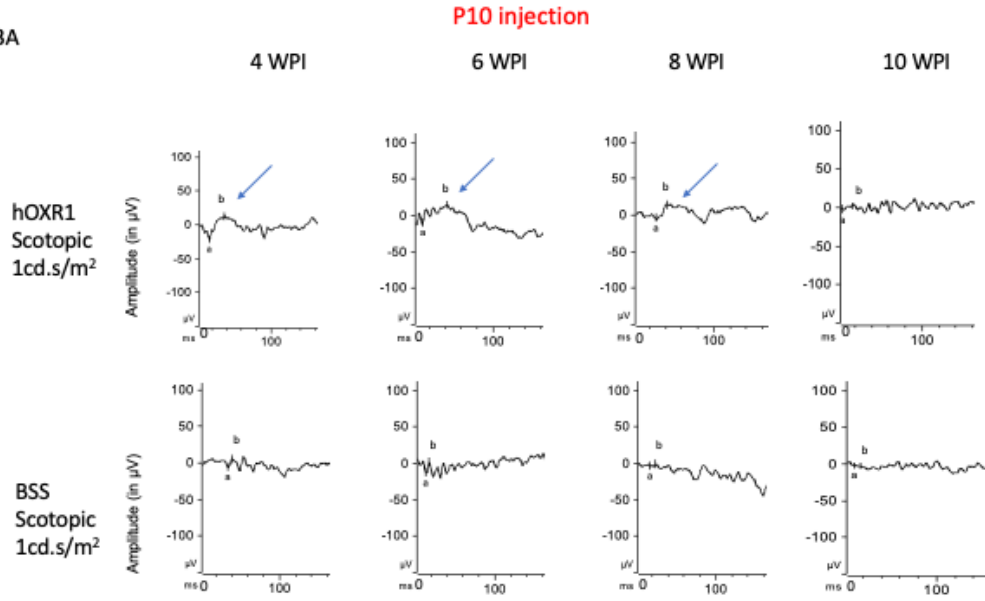

Figure S3B

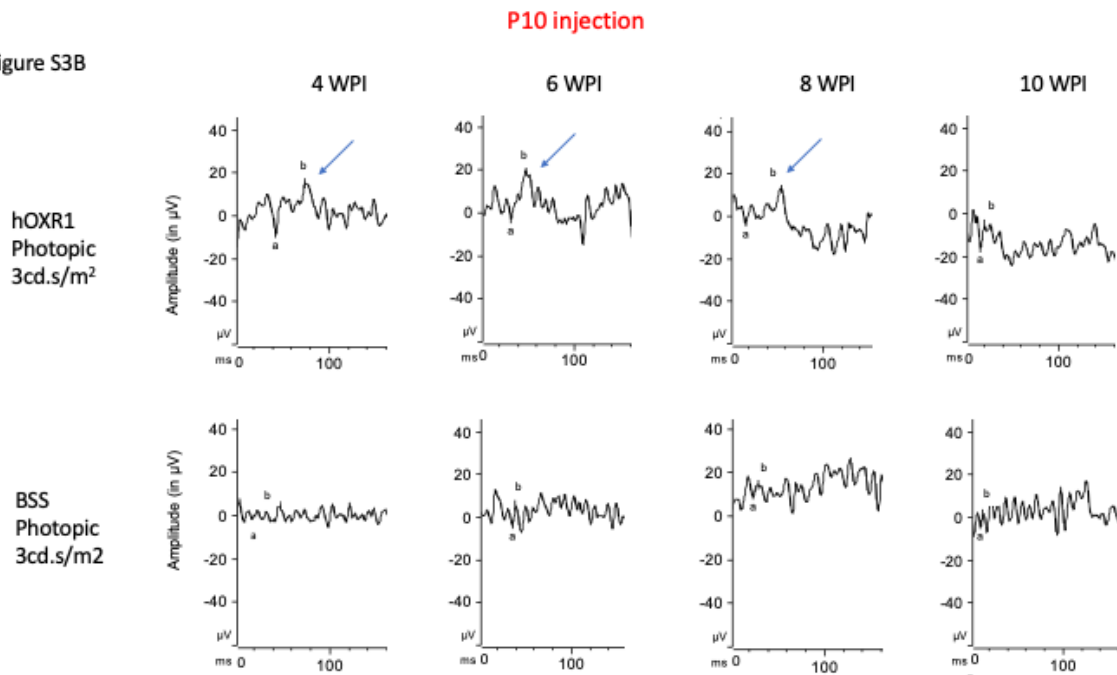

**Figure S3 ERG traces of *rd1* mice AAV8-hOXR1 treated or mock treated at P10. The *rd1* mice were subretinally injected with AAV8-hOXR1 and mock control at P10 and ERG was performed at indicated WPI (A, B). Arrows show detectable ERG peaks at the indicated ages.**
